# Supplementary material
Source: ML conference proceedings conference paper supplement (https://openreview.net/forum?id=hQGRD1Zael7)
Supplement: supplementary_material [file attachment]

## A Appendices for: The Regularizing Effect of Different Output Layer Designs in Deep Neural Networks

### A.1 Implementation and training details

**Architectures** For ResNet [7], VGG [18] and DenseNet [8] we used implementations from PyTorch Hub [15]. For U-Net [16], the implementation of [6] is used. In the decoder of U-Net, the upsampling is learned with transposed convolutions. In the low-resolution datasets CIFAR-100 (C100) [12] and STL-10 [3], the first convolutional layer in both ResNet and DenseNet is adjusted to have a kernel size of 3, a stride of 1, and a padding of 1. In addition, the first maxpool is omitted.

The penultimate layer in DenseNet consists of concatenated nodes from different previous layers. Thus, these nodes or activations have different semantics and representational capacities. However, in  $W^{1to1}$  and  $W^{ensemble}$ , it should not matter which specific channels are used as logits vector(s). Due to this specific connectivity pattern, we insert a group of 1x1 conv layer, BN and ReLU with the same number of input and output channels before the output layer in DenseNets for  $W^{1to1}$  and  $W^{ensemble}$ .

**Hyperparameters** Both  $\alpha = 0.1$  for  $W^{scale}$  and  $q = 0.9$  for  $W^{sparse}$  were motivated by early experiments to reduce neuron dependency and/or increase neuron expressivity but were not tuned to individual settings. In comparison, hyperparameters are tuned for the methods we compare against. Grid search is applied for dropout [19] and dropconnect [23] (options for drop probability: 0.2, 0.5, 0.7, 0.9). In both methods, a large value of 0.7 worked best. For additive gaussian noise [4], we found that less noise generally performs better, so we stick to  $\sigma = 0.1$  in all settings. If not specified otherwise, hyperparameter  $H$  for  $W^{ensemble}$  is set to its maximum given any architecture/dataset setting, i.e.  $H = \lfloor N/K \rfloor$ . For semantic segmentation, this maximum is not defined. We therefore set  $H = 10$ , which should be large enough to notice a difference compared to the baseline. For the proposed layers, we tune only  $\alpha$  in  $W^{ensemble}$  (options: 0.5, 1.0, 2.0). Larger values result in faster training as smaller activation values are amplified. In settings without pre-training,  $\alpha = 0.5$  and  $\alpha = 1.0$  work best. For fine-tuning,  $\alpha = 2.0$  is beneficial in multiple settings. In general, hyperparameter tuning is conducted on a small development set, which is constructed from the original training set. See also the ablation study in Sect. 5.7, which gives more insights about appropriate hyperparameter choices.

**Optimization** Our setup is similar to prior works (e.g., [7, 8]). In most settings, we use stochastic gradient descent (SGD) with Nesterov momentum [20] of 0.9 without dampening and weight decay of 0.0001. For medical imaging datasets, we chose Adam [10] because it consistently performed better in early experiments. The learning rate is 0.1 in SGD and 0.001 in Adam. For fine-tuning and SGD, the initial learning rate is reduced to 0.01. During training, the learning rate is reduced by a factor of 10 each time performance reaches a plateau with a patience level of 15 epochs. The number of epochs varies for different datasets. In ImageNet (IN) [17] we train for 90 epochs, for the other datasets the number of epochs varies between 200 and 300 depending on the training progress. The batch size for IN and APTOS [1] is 256. In APTOS, we achieved better results with larger batch sizes, possibly due to class imbalance. In order to run multiple experiments in parallel, we chose a smaller batch size of 32 for all other datasets. For segmentation, the batch size is set to 16 due larger image dimensions of  $512 \times 512$ .

**Preprocessing and augmentation** Images from all datasets are standardized by subtracting the mean and dividing by the standard deviation of each channel of the training data. In fine-tuning settings, we use the statistics of IN. In CUB-200 [22], Cars-196 [11], Food-101 [2] and IN, images are resized with the shorter side randomly sampled in [256, 480] while maintaining the aspect ratio, and then randomly cropped to  $224 \times 224$ . For evaluation, images from these datasets are resized to  $256 \times 256$  and 10-crop testing [13] is applied. Except for segmentation datasets, we use random horizontal flips. In APTOS, images are resized to  $224 \times 224$ , randomly flipped along the vertical axis and scaled (85 – 115% of original dimensions). In SLIVER [21] and CHAOS [9], we clamp intensities according to the 99<sup>th</sup> intensity percentile to remove outliers. In C100 and STL-10, small translations are added, which are implemented as random crops with a padding of 4 on all sides.

**Compute resources** The experiments were performed on a cluster consisting of 5x GeForce RTX 2080 Ti, 2x TITAN RTX and 4x A100-SXM4-40GB. These resources were used according to their

availability. The project ran over a period of about 3 months. With an estimated usage of one GPU for 12 hours per day, the total emissions amount to an estimated 117 kg of CO<sub>2</sub>eq, of which 0% was directly offset (estimation according to [14]). We plan to track resource usage more closely in future projects.

**Licenses and miscellaneous** We use PyTorch as deep learning framework, as well as its pre-trained models, which are open-source and released under a BSD license. The U-Net implementation of [6] is released under GNU General Public License v3.0. Captum is leveraged to measure neuron dependencies/expressivities and is released under the BSD license. Lucent [5] is applied for feature maximization visualizations in Sect. A.6 under the Apache 2.0 license. All datasets in this paper are available for research purposes. ImageNet partly contains images showing persons (see also [24]). Datasets mentioned in Sect. 5.3 were used in past machine learning challenges and contain de-identified data to the best of our knowledge. Further details about all datasets, including how they were acquired, can be found in the respective references.

## A.2 Code

We provide a colab notebook as supplement which implements all output layers for a ResNet. All layer types are easy to implement and require only a few lines of code to replace the standard output layer. This is shown for PyTorch in the following.

In  $W^{random}$ , parameter updates are deactivated as follows:

```
self.fc = nn.Linear(N, K)
self.fc.requires_grad_(False)
```

In  $W^{scale}$ , activations resulting from the encoder are scaled before the fc output layer:

```
def forward(self, x):
    x = self.encoder(x)
    x = x * alpha
    return self.fc(x)
```

In  $W^{sparse}$ , an additional sparsification function is applied to  $W^{random}$ :

```
def sparsify(self, q):
    K, N = self.fc.weight.data.shape
    num_to_remove = int(q * N)
    idx = torch.stack([torch.randperm(N)[:num_to_remove] for _ in range(K)])
    for i in range(K):
        self.fc.weight.data[i, idx[i]] = 0.
```

In  $W^{1to1}$  and  $W^{ensemble}$ , one can take a slice from the activations according to the number of classes and heads without affecting the backbone specifications. For  $W^{1to1}$ ,  $H = 1$  and  $\alpha = 1$ .

```
def forward(self, x):
    x = self.encoder(x)
    x = x * alpha
    return x[:, :K*H]
```

In addition,  $W^{ensemble}$  requires to compute separate losses for each head:

```
loss = 0
for h in range(H):
    loss += nn.CrossEntropyLoss()(pred[:, h*K:h*K+K], y)
loss /= H
```

## A.3 Additional dependency/expressivity results

This section extends Sect. 3 from the main paper. Table 7 shows instance-based dependencies for all proposed layers and the ResNet backbone in several datasets. In C100, STL-10 and CUB-200, instance-based dependencies are high compared to the other output layers. In CUB-200, e.g., ablating

Table 7: Instance-based dependencies as avg. reduction in probability when ablating the most important neuron per instance w.r.t. the output class. + denotes fine-tuning from a pre-trained model.

|                | C100   | STL-10 | CUB-200 | CUB-200+ |
|----------------|--------|--------|---------|----------|
| $W^{trained}$  | 0.1014 | 0.1375 | 0.2395  | 0.0165   |
| $W^{scaled}$   | 0.0108 | 0.0065 | 0.0208  | 0.0107   |
| $W^{random}$   | 0.0043 | 0.0032 | 0.0125  | 0.0033   |
| $W^{sparse}$   | 0.0103 | 0.0104 | 0.0185  | 0.0122   |
| $W^{lto1}$     | 0.8923 | 0.9195 | 0.7186  | 0.8898   |
| $W^{ensemble}$ | 0.0183 | 0.0020 | 0.0845  | 0.0446   |

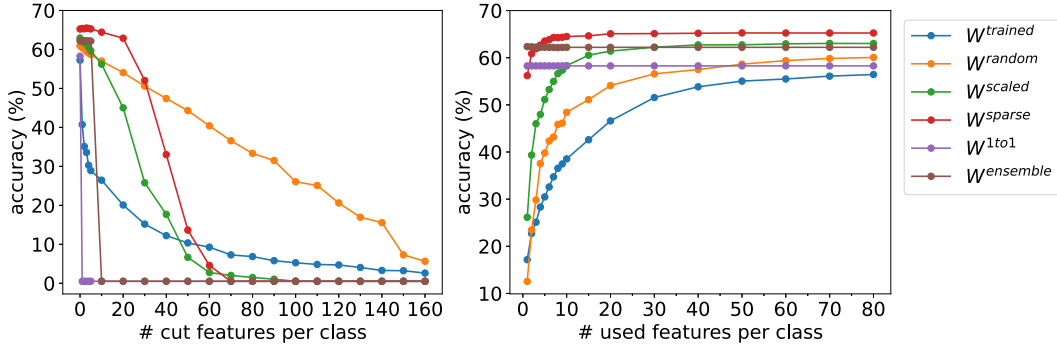

Figure 7: Neuron dependency (**left**) and expressivity (**right**) in a ResNet-50 with 2048 penultimate layer channels trained on **CUB-200** for different output layer designs, showing the change in accuracy on the test set. Best viewed in color.

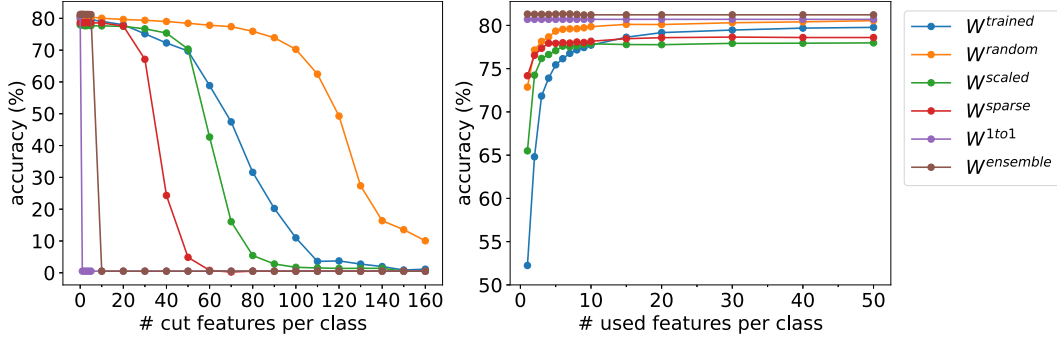

Figure 8: Neuron dependency (**left**) and expressivity (**right**), fine-tuned on **CUB-200** from a pre-trained IN model.

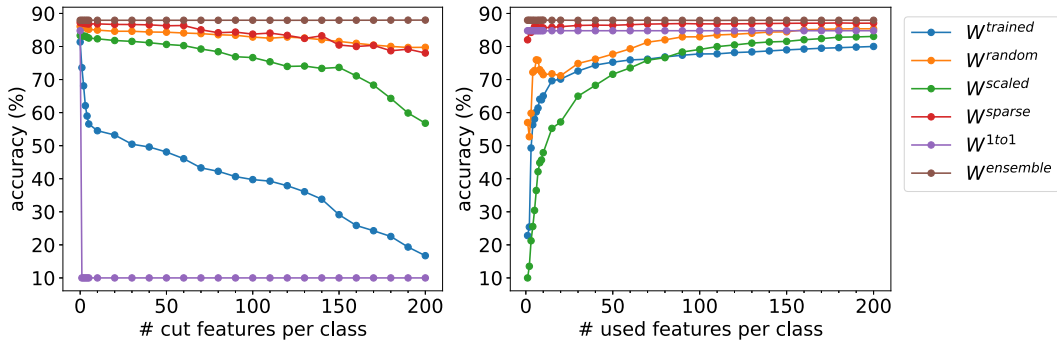

Figure 9: Neuron dependency (**left**) and expressivity (**right**), trained on **STL-10**.

Table 8: Comparing precision, recall and overall weight allocation between a trained and random output layer for different diabetic retinopathy severities in the APTOS dataset. The number of class instances are shown for the test fold. Gray background indicates fixed, random weight allocation.

|               |       | Recall | Precision | # instances | $\sum W_{:,k}$ |
|---------------|-------|--------|-----------|-------------|----------------|
| $W^{trained}$ | Neg.  | 0.95   | 0.95      | 361         | 1.9            |
|               | Mild  | 0.42   | 0.53      | 74          | -1.2           |
|               | Mod.  | 0.78   | 0.63      | 200         | -1.1           |
|               | Prol. | 0.15   | 0.38      | 39          | -6.1           |
|               | Sev.  | 0.36   | 0.41      | 59          | -3.6           |
| $W^{random}$  | Neg.  | 0.97   | 0.95      | 361         | -0.9           |
|               | Mild  | 0.39   | 0.53      | 74          | 0.3            |
|               | Mod.  | 0.83   | 0.69      | 200         | 1.2            |
|               | Prol. | 0.33   | 0.46      | 39          | -0.8           |
|               | Sev.  | 0.46   | 0.61      | 59          | 0.3            |

Table 9: Performance comparison of randomizing or scaling different parts of a ResNet-50. *Block* denotes fixing/scaling the last convolutional block in the network.

|                          | STL-10 | CUB-200 |
|--------------------------|--------|---------|
| $W^{trained}$ (baseline) | 81.36  | 57.18   |
| $W^{trained}$ 3 blocks   | 84.21  | 63.99   |
| $W^{random}$ block       | 86.59  | 67.21   |
| $W^{scaled}$             | 83.33  | 63.46   |
| $W^{scaled}$ network     | 85.66  | 58.40   |
| $W^{scaled}$ block       | 86.42  | 66.74   |

a single neuron reduces the absolute probability for the predicted class by  $\sim 24\%$ . Lowest neuron dependencies are observed in  $W^{random}$ , but the differences to other layers are subtle. The values for  $W^{1to1}$  can be interpreted as average confidence of the model, since there is a direct correspondence between conv channels and classes. We also include results for a pre-trained model for CUB-200. It is worth noting that in this setting, neuron dependencies are reduced for the standard output layer, which corroborates the link to overfitting and generalization. Note also that neuron dependencies tend to decrease with increasing number of heads for  $W^{ensemble}$ . For example, for STL-10,  $H = 204$ , so ablation of a single head does not reduce the output probabilities much. This is in contrast to CUB-200, where  $H = 10$  leads to larger neuron dependencies.

Next, we include additional class-based neuron dependency/expressivity plots for above datasets in Fig. 7, 8 and 9 (see Fig. 4 in the main paper for C100; center crop is used for CUB). As expected, the accuracies in  $W^{1to1}$  and  $W^{ensemble}$  drop to random performance after removing more neurons than heads available, and show (near) maximum performance already when using a single node per class. As for C100, accuracy drops slowest for  $W^{random}$  when ablating a large number of neurons. Both  $W^{sparse}$  and  $W^{scale}$  exhibit relatively small class-based neuron dependencies for small numbers of ablated neurons per class. In comparison, standard output layers perform worse in CUB-200 and STL-10 even for small changes to the network. This changes for pre-trained networks, where  $W^{trained}$  shows comparable class-based neuron dependency/expressivity to other output layers.

#### A.4 Weight allocation in output layers

The APTOS dataset consists of 3662 images, is imbalanced and can be subdivided by diabetic retinopathy (DR) severity: Negative DR (1805 images), Mild DR (370), Moderate DR (999), Proliferative DR (193) and Severe DR (295). Table 8 shows performances for individual classes for a random cross-validation fold. Both recall and precision are improved especially in underrepresented classes. The last column in Table 8 lists aggregated weight values for individual classes. Interestingly, it indi-



124 cates a correlation between weight allocation and class sizes in  $W^{trained}$ , with the negative DR class  
 125 being given the most weight. This suggests a bias in the output layer where over/under-represented  
 126 classes are weighted more/less. This is prevented by design with randomization, but also inherently  
 127 with 1-to-1 and ensemble layers where there is a single node per class.

## 128 A.5 Block scaling/randomization revisited

129 This section extends Sect. 5.5 from the main paper, which showed that fixing the last conv block,  
 130 or scaling the last conv block next to the output layer, can regularize the network and improve  
 131 performance. We want to answer two more questions and refer to Table 9 in the following. First, is  
 132 randomizing the last conv block the main driver of regularization in small datasets, or is it rather a  
 133 reduction of network capacity? We design another ResNet variant, which uses only 3 conv blocks  
 134 followed by GAP, thus omitting the last conv block. We see improved results compared to the  
 135 deeper baseline. However, randomizing the last conv block instead of omitting it again increases  
 136 performance. Next, we are interested whether activation scaling benefits generalization when applied  
 137 to every activation in the network (i.e. after each group of conv layer, BN and ReLU). Again, scaling  
 138 the whole network performs better than  $W^{trained}$ . However, it also performs worse than  $W^{scaled}$  in  
 139 CUB-200. Also, scaling only the last conv block outperforms the other variants in both datasets.

## 140 A.6 Visualization of heads in ensemble layers

141 Why does  $W^{ensemble}$  show better performance than  $W^{1to1}$ ? After all, both consider the same  
 142 channels from the previous conv layer. We conjecture that this is due to different initializations in  
 143 the heads of  $W^{ensemble}$  that might lead to varying local minima and thus complement each other.  
 144 This is illustrated in Fig. 10 where activations for all 10 heads are maximized for two example  
 145 classes in ResNet, fine-tuned on CUB-200. Although the learned visualizations of each head’s class  
 146 node exhibit redundancies in color/structure, subtle differences are observable. For example, similar  
 147 abstract patterns appear in all heads, but vary in orientation, rotation, or occur in different locations.

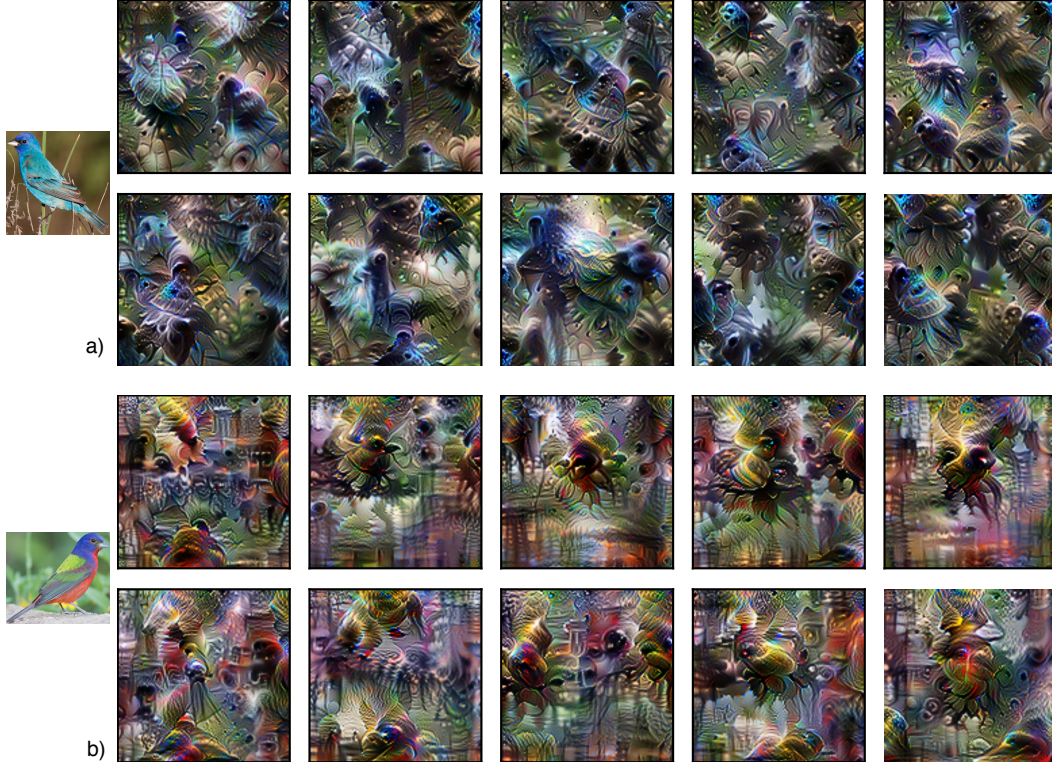

Figure 10: Feature maximization for class nodes across heads in  $W^{ensemble}$  for the indigo (a) and painted bunting (b) with exemplars on the left side. We use Lucent [5] to create these visualizations.

## References

- [1] APTOS. Aptos 2019 blindness detection, 2019. URL <https://www.kaggle.com/c/aptos2019-blindness-detection>.
- [2] Lukas Bossard, Matthieu Guillaumin, and Luc Van Gool. Food-101 – mining discriminative components with random forests. In *European Conference on Computer Vision*, 2014.
- [3] Adam Coates, Andrew Ng, and Honglak Lee. An analysis of single-layer networks in unsupervised feature learning. In *Proceedings of the fourteenth international conference on artificial intelligence and statistics*, pages 215–223. JMLR Workshop and Conference Proceedings, 2011.
- [4] Terrance DeVries and Graham W Taylor. Dataset augmentation in feature space. *arXiv preprint arXiv:1702.05538*, 2017.
- [5] Github. greentfrapp’s github repo, . URL <https://github.com/greentfrapp/lucent>.
- [6] Github. Milesial’s github repo, . URL <https://github.com/milesial/Pytorch-UNet>.
- [7] Kaiming He, Xiangyu Zhang, Shaoqing Ren, and Jian Sun. Deep residual learning for image recognition. In *Proceedings of the IEEE conference on computer vision and pattern recognition*, pages 770–778, 2016.
- [8] Gao Huang, Zhuang Liu, Laurens Van Der Maaten, and Kilian Q Weinberger. Densely connected convolutional networks. In *Proceedings of the IEEE conference on computer vision and pattern recognition*, pages 4700–4708, 2017.
- [9] A Emre Kavur, N Sinem Gezer, Mustafa Barış, Sinem Aslan, Pierre-Henri Conze, Vladimir Groza, Duc Duy Pham, Soumick Chatterjee, Philipp Ernst, Savaş Özkan, et al. Chaos challenge-combined (ct-mr) healthy abdominal organ segmentation. *Medical Image Analysis*, 69:101950, 2021.
- [10] Diederik P Kingma and Jimmy Ba. Adam: A method for stochastic optimization. *arXiv preprint arXiv:1412.6980*, 2014.
- [11] Jonathan Krause, Michael Stark, Jia Deng, and Li Fei-Fei. 3d object representations for fine-grained categorization. In *4th International IEEE Workshop on 3D Representation and Recognition (3dRR-13)*, Sydney, Australia, 2013.
- [12] Alex Krizhevsky, Geoffrey Hinton, et al. Learning multiple layers of features from tiny images. 2009.
- [13] Alex Krizhevsky, Ilya Sutskever, and Geoffrey E Hinton. Imagenet classification with deep convolutional neural networks. *Communications of the ACM*, 60(6):84–90, 2017.
- [14] Alexandre Lacoste, Alexandra Luccioni, Victor Schmidt, and Thomas Dandres. Quantifying the carbon emissions of machine learning. *arXiv preprint arXiv:1910.09700*, 2019.
- [15] PyTorch Hub. Pytorch. URL <https://pytorch.org/hub/research-models>.
- [16] Olaf Ronneberger, Philipp Fischer, and Thomas Brox. U-net: Convolutional networks for biomedical image segmentation. In *International Conference on Medical image computing and computer-assisted intervention*, pages 234–241. Springer, 2015.
- [17] Olga Russakovsky, Jia Deng, Hao Su, Jonathan Krause, Sanjeev Satheesh, Sean Ma, Zhiheng Huang, Andrej Karpathy, Aditya Khosla, Michael Bernstein, Alexander C. Berg, and Li Fei-Fei. ImageNet Large Scale Visual Recognition Challenge. *International Journal of Computer Vision (IJCV)*, 115(3):211–252, 2015. doi: 10.1007/s11263-015-0816-y.
- [18] Karen Simonyan and Andrew Zisserman. Very deep convolutional networks for large-scale image recognition. *arXiv preprint arXiv:1409.1556*, 2014.
- [19] Nitish Srivastava, Geoffrey Hinton, Alex Krizhevsky, Ilya Sutskever, and Ruslan Salakhutdinov. Dropout: a simple way to prevent neural networks from overfitting. *The journal of machine learning research*, 15(1):1929–1958, 2014.

- 194 [20] Ilya Sutskever, James Martens, George Dahl, and Geoffrey Hinton. On the importance of  
195 initialization and momentum in deep learning. In *International conference on machine learning*,  
196 pages 1139–1147, 2013.
- 197 [21] Bram Van Ginneken, Tobias Heimann, and Martin Styner. 3d segmentation in the clinic: A  
198 grand challenge. In *MICCAI Workshop on 3D Segmentation in the Clinic: A Grand Challenge*,  
199 volume 1, pages 7–15, 2007.
- 200 [22] C. Wah, S. Branson, P. Welinder, P. Perona, and S. Belongie. The Caltech-UCSD Birds-200-2011  
201 Dataset. Technical Report CNS-TR-2011-001, California Institute of Technology, 2011.
- 202 [23] Li Wan, Matthew Zeiler, Sixin Zhang, Yann Le Cun, and Rob Fergus. Regularization of  
203 neural networks using dropconnect. In *International conference on machine learning*, pages  
204 1058–1066. PMLR, 2013.
- 205 [24] Kaiyu Yang, Jacqueline Yau, Li Fei-Fei, Jia Deng, and Olga Russakovsky. A study of face  
206 obfuscation in imagenet. *arXiv preprint arXiv:2103.06191*, 2021.
